# Supplementary material
Source: publisher figshare collection journal article supplement (https://acs.figshare.com/ndownloader/files/5678049)
Supplement: Supplementary file 1 [file 5678049]

data_jiw376

_audit_creation_method            SHELXL-97
_chemical_name_systematic
;
 ?
;
_chemical_name_common             'Tetrakis(3-hydroxyphenyl)silane'
_chemical_melting_point           '272 - 273 C'
_chemical_formula_moiety          'C24 H20 O4 Si'
_chemical_formula_sum             'C24 H20 O4 Si'
_chemical_formula_weight          400.49
_chemical_compound_source         'Synthesized by the authors. See text'

loop_
 _atom_type_symbol
 _atom_type_description
 _atom_type_scat_dispersion_real
 _atom_type_scat_dispersion_imag
 _atom_type_scat_source
 'C'  'C'   0.0181   0.0091
 'International Tables Vol C Tables 4.2.6.8 and 6.1.1.4'
 'H'  'H'   0.0000   0.0000
 'International Tables Vol C Tables 4.2.6.8 and 6.1.1.4'
 'O'  'O'   0.0492   0.0322
 'International Tables Vol C Tables 4.2.6.8 and 6.1.1.4'
 'Si'  'Si'   0.2541   0.3302
 'International Tables Vol C Tables 4.2.6.8 and 6.1.1.4'

_symmetry_cell_setting            Tetragonal
_symmetry_space_group_name_H-M    I41/a

loop_
 _symmetry_equiv_pos_as_xyz
 'x, y, z'
 '-y+3/4, x+1/4, z+1/4'
 '-x+1/2, -y, z+1/2'
 'y+3/4, -x+3/4, z+3/4'
 'x+1/2, y+1/2, z+1/2'
 '-y+5/4, x+3/4, z+3/4'
 '-x+1, -y+1/2, z+1'
 'y+5/4, -x+5/4, z+5/4'
 '-x, -y, -z'
 'y-3/4, -x-1/4, -z-1/4'
 'x-1/2, y, -z-1/2'
 '-y-3/4, x-3/4, -z-3/4'
 '-x+1/2, -y+1/2, -z+1/2'
 'y-1/4, -x+1/4, -z+1/4'
 'x, y+1/2, -z'
 '-y-1/4, x-1/4, -z-1/4'

_cell_length_a                    17.1641(2)
_cell_length_b                    17.1641(2)
_cell_length_c                    7.26760(10)
_cell_angle_alpha                 90.00
_cell_angle_beta                  90.00
_cell_angle_gamma                 90.00
_cell_volume                      2141.08(5)
_cell_formula_units_Z             4
_cell_measurement_temperature     226.0
_cell_measurement_reflns_used     11944
_cell_measurement_theta_min       3.64
_cell_measurement_theta_max       72.82

_exptl_crystal_description        block
_exptl_crystal_colour             Colourless
_exptl_crystal_size_max           0.50
_exptl_crystal_size_mid           0.50
_exptl_crystal_size_min           0.30
_exptl_crystal_density_meas       none
_exptl_crystal_density_diffrn     1.242
_exptl_crystal_density_method     'not measured'
_exptl_crystal_F_000              840
_exptl_absorpt_coefficient_mu     1.188
_exptl_absorpt_correction_type    multi-scan
_exptl_absorpt_correction_T_min   0.4900
_exptl_absorpt_correction_T_max   1.0000
_exptl_absorpt_process_details    'Sadabs (Sheldrick,1996)'

_exptl_special_details
;
X-ray crystallographic data for I were collected from a single crystal
 sample, which was mounted on a glass fiber. Data were collected using
a Bruker Platform diffractometer, equipped with a Bruker SMART 2K
Charged-Coupled Device (CCD) Area Detector using the program SMART and
normal focus sealed tube source graphite monochromated Cu-K\a radiation.
The crystal-to-detector distance was 4.908 cm, and the data collection
was carried out in 512 x 512 pixel mode, utilizing 4 x 4 pixel binning.
The initial unit cell parameters were determined by a least-squares fit
of the angular setting of strong reflections, collected by a 9.0 degree
scan in 30 frames over four different parts of the reciprocal space
(120 frames total).  One complete sphere of data was collected, to
better than 0.8\%A resolution.  Upon completion of the data collection,
the first 101 frames were recollected in order to improve the decay
correction analysis.
;

_diffrn_ambient_temperature       226.0
_diffrn_radiation_wavelength      1.54180
_diffrn_radiation_type            CuK\a
_diffrn_radiation_source          'Sealed Tube'
_diffrn_radiation_monochromator   graphite
_diffrn_measurement_device_type   'Bruker AXS Smart 2K/Platform'
_diffrn_measurement_method        '\w'
_diffrn_detector_area_resol_mean   5.5
_diffrn_standards_number          90
_diffrn_standards_interval_count  ?
_diffrn_standards_interval_time   ?
_diffrn_standards_decay_%         -0.06
_diffrn_reflns_number             12866
_diffrn_reflns_av_R_equivalents   0.064
_diffrn_reflns_av_sigmaI/netI     0.0198
_diffrn_reflns_limit_h_min        -21
_diffrn_reflns_limit_h_max        21
_diffrn_reflns_limit_k_min        -20
_diffrn_reflns_limit_k_max        17
_diffrn_reflns_limit_l_min        -8
_diffrn_reflns_limit_l_max        8
_diffrn_reflns_theta_min          5.15
_diffrn_reflns_theta_max          72.81
_reflns_number_total              1062
_reflns_number_gt                 1057
_reflns_threshold_expression      >2sigma(I)

_computing_data_collection        'SMART (Bruker, 1999)'
_computing_cell_refinement        'SMART (Bruker, 1999)'
_computing_data_reduction         'SAINT (Bruker, 1999)'
_computing_structure_solution     'SHELXS-97 (Sheldrick, 1990)'
_computing_structure_refinement   'SHELXL-97 (Sheldrick, 1997)'
_computing_molecular_graphics     'XP (Bruker, 1999)'
_computing_publication_material   'Shelxl (Sheldrick 1997)'

_refine_special_details
;
 Refinement of F^2^ against ALL reflections.  The weighted R-factor wR and
 goodness of fit S are based on F^2^, conventional R-factors R are based
 on F, with F set to zero for negative F^2^. The threshold expression of
 F^2^ > 2sigma(F^2^) is used only for calculating R-factors(gt) etc. and is
 not relevant to the choice of reflections for refinement.  R-factors based
 on F^2^ are statistically about twice as large as those based on F, and R-
 factors based on ALL data will be even larger.
;

_refine_ls_structure_factor_coef  Fsqd
_refine_ls_matrix_type            full
_refine_ls_weighting_scheme       calc
_refine_ls_weighting_details
 'calc w=1/[\s^2^(Fo^2^)+(0.0780P)^2^+1.1996P] where P=(Fo^2^+2Fc^2^)/3'
_atom_sites_solution_primary      direct
_atom_sites_solution_secondary    difmap
_atom_sites_solution_hydrogens    geom
_refine_ls_hydrogen_treatment     constr
_refine_ls_extinction_method      SHELXL
_refine_ls_extinction_coef        0.0016(5)
_refine_ls_extinction_expression
 'Fc^*^=kFc[1+0.001xFc^2^\l^3^/sin(2\q)]^-1/4^'
_refine_ls_number_reflns          1062
_refine_ls_number_parameters      67
_refine_ls_number_restraints      0
_refine_ls_R_factor_all           0.0446
_refine_ls_R_factor_gt            0.0445
_refine_ls_wR_factor_ref          0.1321
_refine_ls_wR_factor_gt           0.1319
_refine_ls_goodness_of_fit_ref    1.157
_refine_ls_restrained_S_all       1.157
_refine_ls_shift/su_max           0.000
_refine_ls_shift/su_mean          0.000

loop_
 _atom_site_label
 _atom_site_type_symbol
 _atom_site_fract_x
 _atom_site_fract_y
 _atom_site_fract_z
 _atom_site_U_iso_or_equiv
 _atom_site_adp_type
 _atom_site_occupancy
 _atom_site_symmetry_multiplicity
 _atom_site_calc_flag
 _atom_site_refinement_flags
 _atom_site_disorder_assembly
 _atom_site_disorder_group
Si1 Si 0.0000 0.2500 0.6250 0.0261(3) Uani 1 4 d S . .
O12 O 0.16883(7) 0.47851(7) 0.3539(2) 0.0496(4) Uani 1 1 d . . .
H12 H 0.1984 0.4594 0.4322 0.074 Uiso 1 1 calc . . .
C10 C 0.01645(8) 0.33667(8) 0.4731(2) 0.0291(4) Uani 1 1 d . . .
C11 C 0.08621(8) 0.37767(8) 0.4764(2) 0.0303(4) Uani 1 1 d . . .
H11 H 0.1252 0.3637 0.5587 0.039 Uiso 1 1 d R . .
C12 C 0.09895(9) 0.43947(9) 0.3562(2) 0.0339(4) Uani 1 1 d . . .
C13 C 0.04153(11) 0.46258(10) 0.2353(2) 0.0422(5) Uani 1 1 d . . .
H13 H 0.0496 0.5043 0.1559 0.055 Uiso 1 1 d R . .
C14 C -0.02862(11) 0.42257(12) 0.2328(3) 0.0475(5) Uani 1 1 d . . .
H14 H -0.0682 0.4383 0.1540 0.062 Uiso 1 1 d R . .
C15 C -0.04073(10) 0.35962(10) 0.3474(2) 0.0410(5) Uani 1 1 d . . .
H15 H -0.0868 0.3313 0.3399 0.053 Uiso 1 1 d R . .

loop_
 _atom_site_aniso_label
 _atom_site_aniso_U_11
 _atom_site_aniso_U_22
 _atom_site_aniso_U_33
 _atom_site_aniso_U_23
 _atom_site_aniso_U_13
 _atom_site_aniso_U_12
Si1 0.0227(3) 0.0227(3) 0.0330(5) 0.000 0.000 0.000
O12 0.0338(7) 0.0428(7) 0.0722(9) 0.0253(6) -0.0089(6) -0.0110(5)
C10 0.0284(7) 0.0249(7) 0.0341(8) -0.0003(5) 0.0000(5) 0.0002(5)
C11 0.0265(7) 0.0262(7) 0.0381(8) 0.0029(5) -0.0013(6) 0.0022(5)
C12 0.0294(8) 0.0274(7) 0.0448(9) 0.0037(6) 0.0008(6) -0.0029(6)
C13 0.0457(10) 0.0376(9) 0.0433(9) 0.0138(7) -0.0057(7) -0.0051(7)
C14 0.0424(10) 0.0537(11) 0.0462(10) 0.0157(8) -0.0165(7) -0.0079(8)
C15 0.0347(9) 0.0436(9) 0.0446(9) 0.0075(7) -0.0097(7) -0.0104(6)

_geom_special_details
;
 All esds (except the esd in the dihedral angle between two l.s. planes)
 are estimated using the full covariance matrix.  The cell esds are taken
 into account individually in the estimation of esds in distances, angles
 and torsion angles; correlations between esds in cell parameters are only
 used when they are defined by crystal symmetry.  An approximate (isotropic)
 treatment of cell esds is used for estimating esds involving l.s. planes.
;

loop_
 _geom_bond_atom_site_label_1
 _geom_bond_atom_site_label_2
 _geom_bond_distance
 _geom_bond_site_symmetry_2
 _geom_bond_publ_flag
Si1 C10 1.8740(14) 7_454 Y
Si1 C10 1.8740(14) . Y
Si1 C10 1.8740(14) 12_667 Y
Si1 C10 1.8740(14) 14_556 Y
O12 C12 1.374(2) . Y
C10 C11 1.389(2) . Y
C10 C15 1.397(2) . Y
C11 C12 1.392(2) . Y
C12 C13 1.379(2) . Y
C13 C14 1.386(3) . Y
C14 C15 1.380(2) . Y

loop_
 _geom_angle_atom_site_label_1
 _geom_angle_atom_site_label_2
 _geom_angle_atom_site_label_3
 _geom_angle
 _geom_angle_site_symmetry_1
 _geom_angle_site_symmetry_3
 _geom_angle_publ_flag
C10 Si1 C10 107.80(9) 7_454 . Y
C10 Si1 C10 110.32(5) 7_454 12_667 Y
C10 Si1 C10 110.32(4) . 12_667 Y
C10 Si1 C10 110.32(4) 7_454 14_556 Y
C10 Si1 C10 110.32(5) . 14_556 Y
C10 Si1 C10 107.80(9) 12_667 14_556 Y
C11 C10 C15 118.30(13) . . Y
C11 C10 Si1 121.45(11) . . Y
C15 C10 Si1 120.20(11) . . Y
C10 C11 C12 120.72(13) . . Y
O12 C12 C13 118.43(14) . . Y
O12 C12 C11 121.11(14) . . Y
C13 C12 C11 120.46(14) . . Y
C12 C13 C14 119.14(15) . . Y
C15 C14 C13 120.70(15) . . Y
C14 C15 C10 120.63(15) . . Y

loop_
 _geom_torsion_atom_site_label_1
 _geom_torsion_atom_site_label_2
 _geom_torsion_atom_site_label_3
 _geom_torsion_atom_site_label_4
 _geom_torsion
 _geom_torsion_site_symmetry_1
 _geom_torsion_site_symmetry_2
 _geom_torsion_site_symmetry_3
 _geom_torsion_site_symmetry_4
 _geom_torsion_publ_flag
C10 Si1 C10 C11 -118.12(13) 7_454 . . . Y
C10 Si1 C10 C11 121.37(15) 12_667 . . . Y
C10 Si1 C10 C11 2.39(12) 14_556 . . . Y
C10 Si1 C10 C15 59.25(12) 7_454 . . . Y
C10 Si1 C10 C15 -61.26(10) 12_667 . . . Y
C10 Si1 C10 C15 179.75(14) 14_556 . . . Y
C15 C10 C11 C12 -0.7(2) . . . . Y
Si1 C10 C11 C12 176.75(12) . . . . Y
C10 C11 C12 O12 -177.58(15) . . . . Y
C10 C11 C12 C13 2.0(2) . . . . Y
O12 C12 C13 C14 178.43(18) . . . . Y
C11 C12 C13 C14 -1.1(3) . . . . Y
C12 C13 C14 C15 -1.0(3) . . . . Y
C13 C14 C15 C10 2.3(3) . . . . Y
C11 C10 C15 C14 -1.4(3) . . . . Y
Si1 C10 C15 C14 -178.90(15) . . . . Y

loop_
 _geom_hbond_atom_site_label_D
 _geom_hbond_atom_site_label_H
 _geom_hbond_atom_site_label_A
 _geom_hbond_distance_DH
 _geom_hbond_distance_HA
 _geom_hbond_distance_DA
 _geom_hbond_angle_DHA
 _geom_hbond_site_symmetry_A
O12 H12 O12  0.83 1.90 2.7304(13) 176.4 2

_diffrn_measured_fraction_theta_max    0.996
_diffrn_reflns_theta_full              72.81
_diffrn_measured_fraction_theta_full   0.996
_refine_diff_density_max    0.315
_refine_diff_density_min   -0.164
_refine_diff_density_rms    0.048


#==END


data_jiw226

_audit_creation_method            SHELXL-97
_chemical_name_systematic
;
 ?
;
_chemical_name_common
 'Tetrakis(4-hydroxyphenyl)methane - ethyl acetate clathrate'
_chemical_melting_point           ?
_chemical_formula_moiety          ?
_chemical_formula_sum             'C29 H28 O6'
_chemical_formula_weight          472.51
_chemical_compound_source         'Synthesized by the authors. See text'

loop_
 _atom_type_symbol
 _atom_type_description
 _atom_type_scat_dispersion_real
 _atom_type_scat_dispersion_imag
 _atom_type_scat_source
 'C'  'C'   0.0181   0.0091
 'International Tables Vol C Tables 4.2.6.8 and 6.1.1.4'
 'H'  'H'   0.0000   0.0000
 'International Tables Vol C Tables 4.2.6.8 and 6.1.1.4'
 'O'  'O'   0.0492   0.0322
 'International Tables Vol C Tables 4.2.6.8 and 6.1.1.4'

_symmetry_cell_setting            Monoclinic
_symmetry_space_group_name_H-M    P21/c

loop_
 _symmetry_equiv_pos_as_xyz
 'x, y, z'
 '-x, y+1/2, -z+1/2'
 '-x, -y, -z'
 'x, -y-1/2, z-1/2'

_cell_length_a                    10.243(4)
_cell_length_b                    15.673(6)
_cell_length_c                    15.412(8)
_cell_angle_alpha                 90.00
_cell_angle_beta                  100.86(4)
_cell_angle_gamma                 90.00
_cell_volume                      2429.9(18)
_cell_formula_units_Z             4
_cell_measurement_temperature     223(2)
_cell_measurement_reflns_used     25
_cell_measurement_theta_min       15
_cell_measurement_theta_max       30

_exptl_crystal_description        block
_exptl_crystal_colour             Colourless
_exptl_crystal_size_max           0.24
_exptl_crystal_size_mid           0.22
_exptl_crystal_size_min           0.20
_exptl_crystal_density_meas       none
_exptl_crystal_density_diffrn     1.292
_exptl_crystal_density_method     'not measured'
_exptl_crystal_F_000              1000
_exptl_absorpt_coefficient_mu     0.732
_exptl_absorpt_correction_type    none
_exptl_absorpt_correction_T_min   0.8400
_exptl_absorpt_correction_T_max   0.8700
_exptl_absorpt_process_details    'No absorption correction applied'

_exptl_special_details
;
;

_diffrn_ambient_temperature       223(2)
_diffrn_radiation_wavelength      1.54178
_diffrn_radiation_type            CuK\a
_diffrn_radiation_source          'Sealed Tube'
_diffrn_radiation_monochromator   graphite
_diffrn_measurement_device_type   'Enraf-Nonius CAD-4'
_diffrn_measurement_method        '\w/2\q'
_diffrn_detector_area_resol_mean   0.0
_diffrn_standards_number          5
_diffrn_standards_interval_count  ?
_diffrn_standards_interval_time   60
_diffrn_standards_decay_%         ?
_diffrn_reflns_number             4603
_diffrn_reflns_av_R_equivalents   0.040
_diffrn_reflns_av_sigmaI/netI     0.0396
_diffrn_reflns_limit_h_min        0
_diffrn_reflns_limit_h_max        12
_diffrn_reflns_limit_k_min        0
_diffrn_reflns_limit_k_max        19
_diffrn_reflns_limit_l_min        -18
_diffrn_reflns_limit_l_max        18
_diffrn_reflns_theta_min          4.06
_diffrn_reflns_theta_max          70.02
_reflns_number_total              4603
_reflns_number_gt                 3489
_reflns_threshold_expression      >2sigma(I)

_computing_data_collection        'CAD4 Program (Nonius 1989)'
_computing_cell_refinement        'CAD4 Program (Nonius 1989)'
_computing_data_reduction         'Local Program'
_computing_structure_solution     'SHELXS-97 (Sheldrick, 1990)'
_computing_structure_refinement   'SHELXL-97 (Sheldrick, 1997)'
_computing_molecular_graphics     'XP (Bruker, 1999)'
_computing_publication_material   'Shelxl (Sheldrick 1997)'

_refine_special_details
;
 Refinement of F^2^ against ALL reflections.  The weighted R-factor wR and
 goodness of fit S are based on F^2^, conventional R-factors R are based
 on F, with F set to zero for negative F^2^. The threshold expression of
 F^2^ > 2sigma(F^2^) is used only for calculating R-factors(gt) etc. and is
 not relevant to the choice of reflections for refinement.  R-factors based
 on F^2^ are statistically about twice as large as those based on F, and R-
 factors based on ALL data will be even larger.
;

_refine_ls_structure_factor_coef  Fsqd
_refine_ls_matrix_type            full
_refine_ls_weighting_scheme       calc
_refine_ls_weighting_details
 'calc w=1/[\s^2^(Fo^2^)+(0.1025P)^2^+0.3076P] where P=(Fo^2^+2Fc^2^)/3'
_atom_sites_solution_primary      direct
_atom_sites_solution_secondary    difmap
_atom_sites_solution_hydrogens    geom
_refine_ls_hydrogen_treatment     constr
_refine_ls_extinction_method      SHELXL
_refine_ls_extinction_coef        0.0034(5)
_refine_ls_extinction_expression
 'Fc^*^=kFc[1+0.001xFc^2^\l^3^/sin(2\q)]^-1/4^'
_refine_ls_number_reflns          4603
_refine_ls_number_parameters      317
_refine_ls_number_restraints      0
_refine_ls_R_factor_all           0.0715
_refine_ls_R_factor_gt            0.0584
_refine_ls_wR_factor_ref          0.1835
_refine_ls_wR_factor_gt           0.1740
_refine_ls_goodness_of_fit_ref    1.117
_refine_ls_restrained_S_all       1.117
_refine_ls_shift/su_max           0.000
_refine_ls_shift/su_mean          0.000

loop_
 _atom_site_label
 _atom_site_type_symbol
 _atom_site_fract_x
 _atom_site_fract_y
 _atom_site_fract_z
 _atom_site_U_iso_or_equiv
 _atom_site_adp_type
 _atom_site_occupancy
 _atom_site_symmetry_multiplicity
 _atom_site_calc_flag
 _atom_site_refinement_flags
 _atom_site_disorder_assembly
 _atom_site_disorder_group
C1 C 0.26201(18) 0.27417(14) -0.00590(12) 0.0324(4) Uani 1 1 d . A 1
O14 O 0.33531(16) 0.51476(10) -0.27148(10) 0.0474(4) Uani 1 1 d . A 1
H14 H 0.2711 0.5168 -0.3133 0.071 Uiso 1 1 calc . B 1
C11 C 0.27479(19) 0.33584(12) -0.08229(13) 0.0336(4) Uani 1 1 d . A 1
C12 C 0.3869(2) 0.38889(14) -0.07142(14) 0.0388(5) Uani 1 1 d . A 1
H12 H 0.4511 0.3845 -0.0193 0.047 Uiso 1 1 calc R A 1
C13 C 0.4057(2) 0.44728(14) -0.13489(15) 0.0403(5) Uani 1 1 d . A 1
H13 H 0.4826 0.4814 -0.1262 0.048 Uiso 1 1 calc R A 1
C14 C 0.3111(2) 0.45558(13) -0.21154(14) 0.0378(5) Uani 1 1 d . A 1
C15 C 0.1985(2) 0.40523(14) -0.22272(14) 0.0415(5) Uani 1 1 d . A 1
H15 H 0.1332 0.4109 -0.2742 0.050 Uiso 1 1 calc R A 1
C16 C 0.1809(2) 0.34622(14) -0.15863(14) 0.0385(5) Uani 1 1 d . A 1
H16 H 0.1034 0.3127 -0.1674 0.046 Uiso 1 1 calc R A 1
O24 O -0.15854(14) 0.02916(9) -0.07375(10) 0.0401(4) Uani 1 1 d . A 1
H24 H -0.1982 0.0249 -0.0317 0.060 Uiso 1 1 calc . C 1
C21 C 0.13951(19) 0.21487(12) -0.02583(13) 0.0326(4) Uani 1 1 d . A 1
C22 C 0.1223(2) 0.16153(13) -0.09962(14) 0.0372(5) Uani 1 1 d . A 1
H22 H 0.1803 0.1668 -0.1398 0.045 Uiso 1 1 calc R A 1
C23 C 0.0224(2) 0.10121(13) -0.11524(14) 0.0374(5) Uani 1 1 d . A 1
H23 H 0.0121 0.0668 -0.1660 0.045 Uiso 1 1 calc R A 1
C24 C -0.06276(19) 0.09152(12) -0.05566(14) 0.0336(4) Uani 1 1 d . A 1
C25 C -0.0470(2) 0.14193(14) 0.01847(14) 0.0379(5) Uani 1 1 d . A 1
H25 H -0.1041 0.1354 0.0591 0.045 Uiso 1 1 calc R A 1
C26 C 0.0538(2) 0.20272(13) 0.03320(14) 0.0363(5) Uani 1 1 d . A 1
H26 H 0.0642 0.2365 0.0844 0.044 Uiso 1 1 calc R A 1
O34 O 0.68412(14) 0.02932(9) 0.04958(10) 0.0395(4) Uani 1 1 d . A 1
H34 H 0.7074 0.0180 0.1029 0.059 Uiso 1 1 calc . D 1
C31 C 0.38073(19) 0.21156(13) 0.01139(13) 0.0327(4) Uani 1 1 d . A 1
C32 C 0.4620(2) 0.19806(13) -0.05009(14) 0.0357(5) Uani 1 1 d . A 1
H32 H 0.4488 0.2311 -0.1019 0.043 Uiso 1 1 calc R A 1
C33 C 0.5622(2) 0.13693(13) -0.03684(14) 0.0365(5) Uani 1 1 d . A 1
H33 H 0.6153 0.1287 -0.0797 0.044 Uiso 1 1 calc R A 1
C34 C 0.58339(19) 0.08867(12) 0.03875(13) 0.0330(4) Uani 1 1 d . A 1
C35 C 0.5016(2) 0.09904(13) 0.10082(14) 0.0370(5) Uani 1 1 d . A 1
H35 H 0.5150 0.0657 0.1524 0.044 Uiso 1 1 calc R A 1
C36 C 0.4007(2) 0.15867(13) 0.08576(14) 0.0370(5) Uani 1 1 d . A 1
H36 H 0.3438 0.1639 0.1267 0.044 Uiso 1 1 calc R A 1
O44 O 0.22727(19) 0.50461(10) 0.27681(10) 0.0527(5) Uani 1 1 d . A 1
H44 H 0.1843 0.5479 0.2581 0.079 Uiso 1 1 calc . E 1
C41 C 0.2549(2) 0.33368(13) 0.07292(13) 0.0343(5) Uani 1 1 d . A 1
C42 C 0.3514(2) 0.33903(14) 0.14859(14) 0.0400(5) Uani 1 1 d . A 1
H42 H 0.4256 0.3027 0.1549 0.048 Uiso 1 1 calc R A 1
C43 C 0.3419(2) 0.39656(15) 0.21559(15) 0.0442(5) Uani 1 1 d . A 1
H43 H 0.4088 0.3986 0.2665 0.053 Uiso 1 1 calc R A 1
C44 C 0.2342(2) 0.45073(13) 0.20735(14) 0.0401(5) Uani 1 1 d . A 1
C45 C 0.1368(2) 0.44826(14) 0.13205(15) 0.0425(5) Uani 1 1 d . A 1
H45 H 0.0634 0.4853 0.1259 0.051 Uiso 1 1 calc R A 1
C46 C 0.1483(2) 0.39075(14) 0.06576(15) 0.0410(5) Uani 1 1 d . A 1
H46 H 0.0825 0.3900 0.0143 0.049 Uiso 1 1 calc R A 1
O50 O 0.85407(19) 0.16624(11) 0.23647(13) 0.0619(5) Uani 1 1 d . F 1
O51 O 0.7587(3) 0.29105(15) 0.2501(2) 0.1054(9) Uani 1 1 d . F 1
C50 C 0.7308(5) 0.1880(3) 0.3499(3) 0.127(2) Uani 1 1 d . F 1
H51A H 0.7874 0.1455 0.3840 0.191 Uiso 1 1 calc R F 1
H51B H 0.6425 0.1644 0.3305 0.191 Uiso 1 1 calc R F 1
H51C H 0.7252 0.2378 0.3864 0.191 Uiso 1 1 calc R F 1
C52 C 0.7867(3) 0.21237(17) 0.2729(2) 0.0616(7) Uani 1 1 d . F 1
C53 C 0.8327(4) 0.3308(3) 0.1776(3) 0.1023(14) Uani 1 1 d . F 1
H53A H 0.8586 0.3903 0.1909 0.123 Uiso 1 1 calc R F 1
H53B H 0.9110 0.2974 0.1709 0.123 Uiso 1 1 calc R F 1
C54 C 0.7365(5) 0.3245(3) 0.1077(4) 0.167(3) Uani 1 1 d . F 1
H54A H 0.7671 0.3469 0.0564 0.250 Uiso 1 1 calc R F 1
H54B H 0.6600 0.3568 0.1176 0.250 Uiso 1 1 calc R F 1
H54C H 0.7119 0.2650 0.0978 0.250 Uiso 1 1 calc R F 1

loop_
 _atom_site_aniso_label
 _atom_site_aniso_U_11
 _atom_site_aniso_U_22
 _atom_site_aniso_U_33
 _atom_site_aniso_U_23
 _atom_site_aniso_U_13
 _atom_site_aniso_U_12
C1 0.0304(10) 0.0332(10) 0.0330(10) 0.0004(8) 0.0047(8) -0.0006(8)
O14 0.0493(9) 0.0456(9) 0.0479(9) 0.0130(7) 0.0105(7) 0.0020(7)
C11 0.0321(10) 0.0324(10) 0.0360(10) -0.0003(8) 0.0056(8) 0.0015(8)
C12 0.0358(11) 0.0376(11) 0.0403(11) 0.0040(9) 0.0006(9) -0.0022(9)
C13 0.0360(11) 0.0354(11) 0.0484(12) 0.0039(9) 0.0050(9) -0.0034(9)
C14 0.0399(11) 0.0317(10) 0.0429(11) 0.0046(9) 0.0103(9) 0.0061(8)
C15 0.0393(11) 0.0429(12) 0.0400(11) 0.0036(9) 0.0018(9) 0.0042(9)
C16 0.0306(10) 0.0404(11) 0.0434(12) 0.0023(9) 0.0038(9) -0.0010(8)
O24 0.0369(8) 0.0374(8) 0.0463(8) -0.0044(6) 0.0090(6) -0.0064(6)
C21 0.0288(9) 0.0314(10) 0.0371(10) 0.0000(8) 0.0051(8) 0.0004(8)
C22 0.0347(10) 0.0397(11) 0.0389(11) -0.0044(9) 0.0114(9) -0.0020(8)
C23 0.0377(11) 0.0368(11) 0.0384(11) -0.0074(9) 0.0092(8) -0.0020(9)
C24 0.0280(9) 0.0297(10) 0.0420(11) -0.0005(8) 0.0035(8) 0.0006(7)
C25 0.0360(10) 0.0402(11) 0.0393(11) -0.0047(9) 0.0118(8) -0.0020(9)
C26 0.0375(11) 0.0352(10) 0.0371(10) -0.0057(8) 0.0092(8) -0.0029(8)
O34 0.0357(8) 0.0372(8) 0.0459(8) 0.0057(6) 0.0081(6) 0.0049(6)
C31 0.0293(9) 0.0319(10) 0.0363(10) 0.0012(8) 0.0048(8) -0.0026(8)
C32 0.0358(10) 0.0354(11) 0.0364(10) 0.0054(8) 0.0081(8) 0.0012(8)
C33 0.0355(10) 0.0374(11) 0.0379(11) 0.0027(9) 0.0105(8) 0.0010(8)
C34 0.0275(9) 0.0291(10) 0.0418(11) 0.0013(8) 0.0056(8) -0.0025(8)
C35 0.0375(11) 0.0352(11) 0.0390(11) 0.0080(9) 0.0091(9) -0.0009(8)
C36 0.0336(10) 0.0373(11) 0.0420(11) 0.0047(9) 0.0118(9) 0.0002(8)
O44 0.0746(12) 0.0405(9) 0.0435(9) -0.0092(7) 0.0123(8) -0.0063(8)
C41 0.0327(10) 0.0324(10) 0.0373(11) 0.0006(8) 0.0057(8) -0.0049(8)
C42 0.0344(10) 0.0406(11) 0.0432(12) 0.0003(9) 0.0027(9) -0.0013(9)
C43 0.0460(12) 0.0454(12) 0.0388(11) -0.0007(10) 0.0013(9) -0.0075(10)
C44 0.0525(13) 0.0315(10) 0.0380(11) -0.0041(9) 0.0125(9) -0.0119(9)
C45 0.0427(12) 0.0357(11) 0.0489(13) -0.0049(9) 0.0085(10) 0.0002(9)
C46 0.0392(11) 0.0377(11) 0.0428(12) -0.0055(9) -0.0004(9) 0.0007(9)
O50 0.0631(11) 0.0480(10) 0.0790(13) -0.0070(9) 0.0246(10) 0.0042(8)
O51 0.154(3) 0.0557(14) 0.125(2) 0.0118(13) 0.073(2) 0.0318(15)
C50 0.208(6) 0.066(2) 0.144(4) 0.002(2) 0.126(4) 0.018(3)
C52 0.0631(17) 0.0441(14) 0.082(2) -0.0124(13) 0.0241(15) -0.0022(12)
C53 0.070(2) 0.080(2) 0.151(4) -0.035(3) 0.006(2) 0.0068(19)
C54 0.118(4) 0.143(5) 0.206(6) -0.094(5) -0.054(4) 0.032(3)

_geom_special_details
;
 All esds (except the esd in the dihedral angle between two l.s. planes)
 are estimated using the full covariance matrix.  The cell esds are taken
 into account individually in the estimation of esds in distances, angles
 and torsion angles; correlations between esds in cell parameters are only
 used when they are defined by crystal symmetry.  An approximate (isotropic)
 treatment of cell esds is used for estimating esds involving l.s. planes.
;

loop_
 _geom_bond_atom_site_label_1
 _geom_bond_atom_site_label_2
 _geom_bond_distance
 _geom_bond_site_symmetry_2
 _geom_bond_publ_flag
C1 C41 1.544(3) . Y
C1 C21 1.545(3) . Y
C1 C31 1.546(3) . Y
C1 C11 1.548(3) . Y
O14 C14 1.364(3) . Y
C11 C16 1.382(3) . Y
C11 C12 1.402(3) . Y
C12 C13 1.379(3) . Y
C13 C14 1.386(3) . Y
C14 C15 1.381(3) . Y
C15 C16 1.390(3) . Y
O24 C24 1.376(2) . Y
C21 C26 1.392(3) . Y
C21 C22 1.396(3) . Y
C22 C23 1.380(3) . Y
C23 C24 1.389(3) . Y
C24 C25 1.373(3) . Y
C25 C26 1.392(3) . Y
O34 C34 1.376(2) . Y
C31 C32 1.390(3) . Y
C31 C36 1.398(3) . Y
C32 C33 1.391(3) . Y
C33 C34 1.372(3) . Y
C34 C35 1.395(3) . Y
C35 C36 1.380(3) . Y
O44 C44 1.376(3) . Y
C41 C42 1.382(3) . Y
C41 C46 1.399(3) . Y
C42 C43 1.388(3) . Y
C43 C44 1.379(3) . Y
C44 C45 1.381(3) . Y
C45 C46 1.384(3) . Y
O50 C52 1.208(3) . Y
O51 C52 1.299(4) . Y
O51 C53 1.590(5) . Y
C50 C52 1.463(5) . Y
C53 C54 1.319(6) . Y

loop_
 _geom_angle_atom_site_label_1
 _geom_angle_atom_site_label_2
 _geom_angle_atom_site_label_3
 _geom_angle
 _geom_angle_site_symmetry_1
 _geom_angle_site_symmetry_3
 _geom_angle_publ_flag
C41 C1 C21 111.26(16) . . Y
C41 C1 C31 113.58(16) . . Y
C21 C1 C31 103.61(17) . . Y
C41 C1 C11 104.15(17) . . Y
C21 C1 C11 113.98(16) . . Y
C31 C1 C11 110.55(16) . . Y
C16 C11 C12 117.07(19) . . Y
C16 C11 C1 125.17(18) . . Y
C12 C11 C1 117.66(17) . . Y
C13 C12 C11 121.98(19) . . Y
C12 C13 C14 119.9(2) . . Y
O14 C14 C15 123.9(2) . . Y
O14 C14 C13 117.00(19) . . Y
C15 C14 C13 119.1(2) . . Y
C14 C15 C16 120.6(2) . . Y
C11 C16 C15 121.37(19) . . Y
C26 C21 C22 116.88(18) . . Y
C26 C21 C1 122.78(18) . . Y
C22 C21 C1 119.71(18) . . Y
C23 C22 C21 121.89(19) . . Y
C22 C23 C24 119.78(19) . . Y
C25 C24 O24 123.01(19) . . Y
C25 C24 C23 119.81(18) . . Y
O24 C24 C23 117.16(18) . . Y
C24 C25 C26 119.79(19) . . Y
C25 C26 C21 121.81(19) . . Y
C32 C31 C36 117.05(19) . . Y
C32 C31 C1 122.10(18) . . Y
C36 C31 C1 120.43(18) . . Y
C31 C32 C33 121.65(19) . . Y
C34 C33 C32 119.94(19) . . Y
C33 C34 O34 118.10(18) . . Y
C33 C34 C35 119.92(18) . . Y
O34 C34 C35 121.96(18) . . Y
C36 C35 C34 119.41(19) . . Y
C35 C36 C31 121.91(19) . . Y
C42 C41 C46 116.82(19) . . Y
C42 C41 C1 124.61(18) . . Y
C46 C41 C1 118.42(17) . . Y
C41 C42 C43 121.8(2) . . Y
C44 C43 C42 119.9(2) . . Y
O44 C44 C43 117.6(2) . . Y
O44 C44 C45 122.4(2) . . Y
C43 C44 C45 119.9(2) . . Y
C44 C45 C46 119.3(2) . . Y
C45 C46 C41 122.1(2) . . Y
C52 O51 C53 116.8(3) . . Y
O50 C52 O51 124.0(3) . . Y
O50 C52 C50 124.5(3) . . Y
O51 C52 C50 111.5(3) . . Y
C54 C53 O51 99.4(4) . . Y

loop_
 _geom_hbond_atom_site_label_D
 _geom_hbond_atom_site_label_H
 _geom_hbond_atom_site_label_A
 _geom_hbond_distance_DH
 _geom_hbond_distance_HA
 _geom_hbond_distance_DA
 _geom_hbond_angle_DHA
 _geom_hbond_site_symmetry_A
O14 H14 O24  0.83 1.91 2.719(3) 165.1 2_554
O24 H24 O34  0.83 1.90 2.714(2) 168.1 1_455
O34 H34 O44  0.83 1.86 2.687(3) 173.0 2_645
O44 H44 O50  0.83 1.90 2.662(3) 152.0 2_655

_diffrn_measured_fraction_theta_max    0.998
_diffrn_reflns_theta_full              70.02
_diffrn_measured_fraction_theta_full   0.998
_refine_diff_density_max    0.470
_refine_diff_density_min   -0.452
_refine_diff_density_rms    0.053

#==END


data_jiw262

_audit_creation_method            SHELXL-97
_chemical_name_systematic
;
 ?
;
_chemical_name_common
 'tetrakis(4-hydroxyphenyl)silane - water clathrate'
_chemical_melting_point           ?
_chemical_formula_moiety          ''
_chemical_formula_sum             'C24 H22 O5 Si'
_chemical_formula_weight          418.51
_chemical_compound_source         'Synthesized by the authors. See text'

loop_
 _atom_type_symbol
 _atom_type_description
 _atom_type_scat_dispersion_real
 _atom_type_scat_dispersion_imag
 _atom_type_scat_source
 'C'  'C'   0.0181   0.0091
 'International Tables Vol C Tables 4.2.6.8 and 6.1.1.4'
 'H'  'H'   0.0000   0.0000
 'International Tables Vol C Tables 4.2.6.8 and 6.1.1.4'
 'O'  'O'   0.0492   0.0322
 'International Tables Vol C Tables 4.2.6.8 and 6.1.1.4'
 'Si'  'Si'   0.2541   0.3302
 'International Tables Vol C Tables 4.2.6.8 and 6.1.1.4'

_symmetry_cell_setting            Monoclinic
_symmetry_space_group_name_H-M    C2/c

loop_
 _symmetry_equiv_pos_as_xyz
 'x, y, z'
 '-x, y, -z+1/2'
 'x+1/2, y+1/2, z'
 '-x+1/2, y+1/2, -z+1/2'
 '-x, -y, -z'
 'x, -y, z-1/2'
 '-x+1/2, -y+1/2, -z'
 'x+1/2, -y+1/2, z-1/2'

_cell_length_a                    14.962(9)
_cell_length_b                    15.855(11)
_cell_length_c                    19.697(13)
_cell_angle_alpha                 90.0
_cell_angle_beta                  111.49(5)
_cell_angle_gamma                 90.0
_cell_volume                      4348(5)
_cell_formula_units_Z             8
_cell_measurement_temperature     210(2)
_cell_measurement_reflns_used     25
_cell_measurement_theta_min       15
_cell_measurement_theta_max       30

_exptl_crystal_description        block
_exptl_crystal_colour             Colourless
_exptl_crystal_size_max           0.30
_exptl_crystal_size_mid           0.20
_exptl_crystal_size_min           0.10
_exptl_crystal_density_meas       none
_exptl_crystal_density_diffrn     1.279
_exptl_crystal_density_method     'not measured'
_exptl_crystal_F_000              1760
_exptl_absorpt_coefficient_mu     1.226
_exptl_absorpt_correction_type    none
_exptl_absorpt_correction_T_min   0.7100
_exptl_absorpt_correction_T_max   0.8900
_exptl_absorpt_process_details    'No absorption correction applied'

_exptl_special_details
;
;

_diffrn_ambient_temperature       210(2)
_diffrn_radiation_wavelength      1.54178
_diffrn_radiation_type            CuK\a
_diffrn_radiation_source          'Sealed Tube'
_diffrn_radiation_monochromator   graphite
_diffrn_measurement_device_type   'Enraf-Nonius CAD-4'
_diffrn_measurement_method        '\w'
_diffrn_standards_number          5
_diffrn_standards_interval_count  60
_diffrn_standards_interval_time   ?
_diffrn_standards_decay_%         0
_diffrn_reflns_number             4117
_diffrn_reflns_av_R_equivalents   0.0700
_diffrn_reflns_av_sigmaI/netI     0.0738
_diffrn_reflns_limit_h_min          0
_diffrn_reflns_limit_h_max         18
_diffrn_reflns_limit_k_min          0
_diffrn_reflns_limit_k_max         19
_diffrn_reflns_limit_l_min        -23
_diffrn_reflns_limit_l_max         22
_diffrn_reflns_theta_min          4.23
_diffrn_reflns_theta_max          69.93
_reflns_number_total              4117
_reflns_number_gt                 2266
_reflns_threshold_expression      >2sigma(I)

_computing_data_collection        'CAD4 Program (Nonius 1989)'
_computing_cell_refinement        'CAD4 Program (Nonius 1989)'
_computing_data_reduction         'Local Program'
_computing_structure_solution     'SHELXS-97 (Sheldrick, 1990)'
_computing_structure_refinement   'SHELXL-97 (Sheldrick, 1997)'
_computing_molecular_graphics     'XP (Bruker, 1999)'
_computing_publication_material   'Shelxl (Sheldrick 1997)'

_refine_special_details
;
 Refinement of F^2^ against ALL reflections.  The weighted R-factor wR and
 goodness of fit S are based on F^2^, conventional R-factors R are based
 on F, with F set to zero for negative F^2^. The threshold expression of
 F^2^ > 2sigma(F^2^) is used only for calculating R-factors(gt) etc. and is
 not relevant to the choice of reflections for refinement.  R-factors based
 on F^2^ are statistically about twice as large as those based on F, and R-
 factors based on ALL data will be even larger.
;

_refine_ls_structure_factor_coef  Fsqd
_refine_ls_matrix_type            full
_refine_ls_weighting_scheme       calc
_refine_ls_weighting_details
 'calc w=1/[\s^2^(Fo^2^)+(0.0950P)^2^] where P=(Fo^2^+2Fc^2^)/3'
_atom_sites_solution_primary      direct
_atom_sites_solution_secondary    difmap
_atom_sites_solution_hydrogens    geom
_refine_ls_hydrogen_treatment     mixed
_refine_ls_extinction_method      none
_refine_ls_extinction_coef        ?
_refine_ls_number_reflns          4117
_refine_ls_number_parameters      279
_refine_ls_number_restraints      2
_refine_ls_R_factor_all           0.1210
_refine_ls_R_factor_gt            0.0784
_refine_ls_wR_factor_ref          0.2049
_refine_ls_wR_factor_gt           0.1879
_refine_ls_goodness_of_fit_ref    1.064
_refine_ls_restrained_S_all       1.064
_refine_ls_shift/su_max           0.000
_refine_ls_shift/su_mean          0.000

loop_
 _atom_site_label
 _atom_site_type_symbol
 _atom_site_fract_x
 _atom_site_fract_y
 _atom_site_fract_z
 _atom_site_U_iso_or_equiv
 _atom_site_adp_type
 _atom_site_occupancy
 _atom_site_symmetry_multiplicity
 _atom_site_calc_flag
 _atom_site_refinement_flags
 _atom_site_disorder_assembly
 _atom_site_disorder_group
Si1 Si 0.24200(7) 0.07675(8) 0.24886(7) 0.0430(3) Uani 1 1 d . . .
C1 C 0.1847(3) 0.1297(3) 0.3074(2) 0.0418(10) Uani 1 1 d . . .
C2 C 0.1067(3) 0.0961(3) 0.3228(2) 0.0442(11) Uani 1 1 d . . .
H2 H 0.0784 0.0445 0.3008 0.053 Uiso 1 1 calc R . .
C3 C 0.0707(3) 0.1371(3) 0.3693(2) 0.0460(11) Uani 1 1 d . . .
H3 H 0.0178 0.1136 0.3784 0.055 Uiso 1 1 calc R . .
C4 C 0.1102(3) 0.2105(3) 0.4020(2) 0.0434(10) Uani 1 1 d . . .
C5 C 0.1871(3) 0.2467(3) 0.3888(2) 0.0501(12) Uani 1 1 d . . .
H5 H 0.2149 0.2982 0.4115 0.060 Uiso 1 1 calc R . .
C6 C 0.2219(3) 0.2054(3) 0.3412(3) 0.0538(12) Uani 1 1 d . . .
H6 H 0.2737 0.2303 0.3315 0.065 Uiso 1 1 calc R . .
O7 O 0.0732(2) 0.2489(2) 0.44888(16) 0.0553(9) Uani 1 1 d . . .
H71 H 0.0926 0.2990 0.4561 0.074 Uiso 1 1 calc . . .
C11 C 0.3571(3) 0.0262(3) 0.3097(2) 0.0414(10) Uani 1 1 d . . .
C12 C 0.3855(3) -0.0516(3) 0.2933(3) 0.0557(12) Uani 1 1 d . . .
H12 H 0.3454 -0.0806 0.2509 0.067 Uiso 1 1 calc R . .
C13 C 0.4719(3) -0.0889(3) 0.3378(3) 0.0578(13) Uani 1 1 d . . .
H13 H 0.4902 -0.1426 0.3259 0.069 Uiso 1 1 calc R . .
C14 C 0.5299(3) -0.0464(3) 0.3991(2) 0.0478(11) Uani 1 1 d . . .
C15 C 0.5051(3) 0.0316(3) 0.4172(2) 0.0478(11) Uani 1 1 d . . .
H15 H 0.5457 0.0606 0.4594 0.057 Uiso 1 1 calc R . .
C16 C 0.4186(3) 0.0668(3) 0.3716(2) 0.0498(11) Uani 1 1 d . . .
H16 H 0.4010 0.1209 0.3833 0.060 Uiso 1 1 calc R . .
O17 O 0.6127(2) -0.0867(2) 0.44352(18) 0.0617(9) Uani 1 1 d . . .
H171 H 0.6495 -0.0514 0.4722 0.050 Uiso 1 1 calc . . .
C21 C 0.2681(3) 0.1585(3) 0.1917(2) 0.0426(10) Uani 1 1 d . . .
C22 C 0.2075(3) 0.2262(3) 0.1611(2) 0.0529(12) Uani 1 1 d . . .
H22 H 0.1516 0.2327 0.1727 0.063 Uiso 1 1 calc R . .
C23 C 0.2242(3) 0.2845(3) 0.1148(2) 0.0535(12) Uani 1 1 d . . .
H23 H 0.1808 0.3298 0.0951 0.064 Uiso 1 1 calc R . .
C24 C 0.3069(3) 0.2749(3) 0.0980(2) 0.0464(11) Uani 1 1 d . . .
C25 C 0.3677(3) 0.2094(3) 0.1265(2) 0.0508(12) Uani 1 1 d . . .
H25 H 0.4232 0.2032 0.1144 0.061 Uiso 1 1 calc R . .
C26 C 0.3506(3) 0.1520(3) 0.1727(2) 0.0482(11) Uani 1 1 d . . .
H26 H 0.3947 0.1072 0.1922 0.058 Uiso 1 1 calc R . .
O27 O 0.3229(2) 0.3325(2) 0.05192(18) 0.0608(9) Uani 1 1 d . . .
H27 H 0.2948 0.3778 0.0536 0.091 Uiso 1 1 calc . . .
C31 C 0.1653(3) -0.0067(3) 0.1882(2) 0.0424(10) Uani 1 1 d . . .
C32 C 0.1284(3) -0.0762(3) 0.2144(2) 0.0523(12) Uani 1 1 d . . .
H32 H 0.1402 -0.0797 0.2651 0.063 Uiso 1 1 calc R . .
C33 C 0.0764(3) -0.1386(3) 0.1695(2) 0.0539(12) Uani 1 1 d . . .
H33 H 0.0513 -0.1837 0.1889 0.065 Uiso 1 1 calc R . .
C34 C 0.0604(3) -0.1362(3) 0.0961(2) 0.0473(11) Uani 1 1 d . . .
C35 C 0.0969(3) -0.0711(3) 0.0679(2) 0.0563(12) Uani 1 1 d . . .
H35 H 0.0873 -0.0701 0.0175 0.068 Uiso 1 1 calc R . .
C36 C 0.1475(3) -0.0072(3) 0.1135(2) 0.0535(12) Uani 1 1 d . . .
H36 H 0.1710 0.0382 0.0933 0.064 Uiso 1 1 calc R . .
O37 O 0.0061(2) -0.1992(2) 0.05195(18) 0.0647(10) Uani 1 1 d . . .
H371 H 0.0173 -0.2012 0.0132 0.122 Uiso 1 1 calc . . .
O100 O 0.7415(3) 0.0078(3) 0.5386(3) 0.0943(14) Uani 1 1 d D . .
H101 H 0.721(8) 0.052(4) 0.508(4) 0.26(6) Uiso 1 1 d D . .
H102 H 0.783(5) -0.023(5) 0.575(3) 0.18(4) Uiso 1 1 d D . .

loop_
 _atom_site_aniso_label
 _atom_site_aniso_U_11
 _atom_site_aniso_U_22
 _atom_site_aniso_U_33
 _atom_site_aniso_U_23
 _atom_site_aniso_U_13
 _atom_site_aniso_U_12
Si1 0.0318(5) 0.0573(8) 0.0491(6) -0.0008(6) 0.0258(5) 0.0004(5)
C1 0.0294(19) 0.058(3) 0.045(2) 0.000(2) 0.0226(18) 0.0006(19)
C2 0.0279(19) 0.061(3) 0.047(2) -0.002(2) 0.0175(18) -0.0069(19)
C3 0.0290(19) 0.066(3) 0.051(3) 0.001(2) 0.0232(19) -0.003(2)
C4 0.0316(19) 0.061(3) 0.045(2) 0.001(2) 0.0229(18) 0.003(2)
C5 0.041(2) 0.058(3) 0.064(3) -0.007(2) 0.036(2) -0.008(2)
C6 0.042(2) 0.067(3) 0.070(3) -0.013(3) 0.040(2) -0.010(2)
O7 0.0541(18) 0.069(2) 0.064(2) 0.0001(17) 0.0467(16) 0.0061(16)
C11 0.034(2) 0.051(3) 0.050(3) -0.001(2) 0.0282(19) 0.0013(19)
C12 0.044(2) 0.065(3) 0.059(3) -0.009(3) 0.019(2) 0.000(2)
C13 0.047(2) 0.062(3) 0.066(3) -0.010(3) 0.022(2) 0.008(2)
C14 0.036(2) 0.059(3) 0.054(3) 0.003(2) 0.023(2) 0.002(2)
C15 0.040(2) 0.055(3) 0.050(3) -0.003(2) 0.018(2) -0.001(2)
C16 0.040(2) 0.058(3) 0.056(3) -0.006(2) 0.024(2) 0.001(2)
O17 0.0382(16) 0.066(2) 0.073(2) -0.0056(18) 0.0100(15) 0.0051(16)
C21 0.035(2) 0.053(3) 0.050(3) -0.002(2) 0.0269(19) -0.0010(19)
C22 0.036(2) 0.067(3) 0.066(3) 0.012(3) 0.032(2) 0.011(2)
C23 0.041(2) 0.067(3) 0.063(3) 0.011(3) 0.032(2) 0.012(2)
C24 0.039(2) 0.058(3) 0.049(3) 0.004(2) 0.024(2) -0.002(2)
C25 0.036(2) 0.061(3) 0.068(3) 0.005(2) 0.034(2) 0.003(2)
C26 0.035(2) 0.060(3) 0.060(3) 0.005(2) 0.031(2) 0.008(2)
O27 0.0580(19) 0.065(2) 0.075(2) 0.0183(18) 0.0425(18) 0.0073(17)
C31 0.035(2) 0.054(3) 0.046(2) 0.002(2) 0.0242(18) 0.0046(19)
C32 0.055(3) 0.063(3) 0.050(3) 0.000(2) 0.033(2) -0.005(2)
C33 0.054(3) 0.064(3) 0.060(3) -0.007(3) 0.040(2) -0.013(2)
C34 0.041(2) 0.063(3) 0.050(3) -0.010(2) 0.031(2) -0.009(2)
C35 0.062(3) 0.071(3) 0.049(3) -0.007(3) 0.036(2) -0.012(3)
C36 0.048(2) 0.073(3) 0.053(3) -0.001(2) 0.034(2) -0.010(2)
O37 0.061(2) 0.087(3) 0.068(2) -0.0271(19) 0.0498(18) -0.0297(18)
O100 0.076(3) 0.089(3) 0.089(3) 0.014(3) -0.004(3) -0.011(3)

_geom_special_details
;
 All esds (except the esd in the dihedral angle between two l.s. planes)
 are estimated using the full covariance matrix.  The cell esds are taken
 into account individually in the estimation of esds in distances, angles
 and torsion angles; correlations between esds in cell parameters are only
 used when they are defined by crystal symmetry.  An approximate (isotropic)
 treatment of cell esds is used for estimating esds involving l.s. planes.
;


#==============================================================================
#                             MOLECULAR GEOMETRY
#==============================================================================


loop_
        _geom_bond_atom_site_label_1
        _geom_bond_atom_site_label_2
        _geom_bond_site_symmetry_1
        _geom_bond_site_symmetry_2
        _geom_bond_distance
        _geom_bond_publ_flag
Si1            C21            .              .                     1.850(4)   Y
Si1            C31            .              .                     1.868(5)   Y
Si1            C1             .              .                     1.869(4)   Y
Si1            C11            .              .                     1.879(4)   Y
C1             C6             .              .                     1.387(6)   Y
C1             C2             .              .                     1.413(5)   Y
C2             C3             .              .                     1.383(5)   Y
C2             H2             .              .                         0.95   ?
C3             C4             .              .                     1.356(6)   Y
C3             H3             .              .                         0.95   ?
C4             O7             .              .                     1.379(4)   Y
C4             C5             .              .                     1.393(5)   Y
C5             C6             .              .                     1.391(6)   Y
C5             H5             .              .                         0.95   ?
C6             H6             .              .                         0.95   ?
O7             H71            .              .                         0.84   ?
C11            C12            .              .                     1.381(6)   Y
C11            C16            .              .                     1.388(6)   Y
C12            C13            .              .                     1.399(6)   Y
C12            H12            .              .                         0.95   ?
C13            C14            .              .                     1.377(6)   Y
C13            H13            .              .                         0.95   ?
C14            C15            .              .                     1.376(6)   Y
C14            O17            .              .                     1.383(5)   Y
C15            C16            .              .                     1.394(6)   Y
C15            H15            .              .                         0.95   ?
C16            H16            .              .                         0.95   ?
O17            H171           .              .                         0.84   ?
C21            C22            .              .                     1.392(6)   Y
C21            C26            .              .                     1.417(5)   Y
C22            C23            .              .                     1.384(6)   Y
C22            H22            .              .                         0.95   ?
C23            C24            .              .                     1.403(5)   Y
C23            H23            .              .                         0.95   ?
C24            C25            .              .                     1.359(6)   Y
C24            O27            .              .                     1.368(5)   Y
C25            C26            .              .                     1.376(6)   Y
C25            H25            .              .                         0.95   ?
C26            H26            .              .                         0.95   ?
O27            H27            .              .                         0.84   ?
C31            C36            .              .                     1.396(6)   Y
C31            C32            .              .                     1.412(6)   Y
C32            C33            .              .                     1.364(6)   Y
C32            H32            .              .                         0.95   ?
C33            C34            .              .                     1.377(6)   Y
C33            H33            .              .                         0.95   ?
C34            C35            .              .                     1.377(6)   Y
C34            O37            .              .                     1.378(5)   Y
C35            C36            .              .                     1.382(6)   Y
C35            H35            .              .                         0.95   ?
C36            H36            .              .                         0.95   ?
O37            H371           .              .                         0.84   ?
O100           H101           .              .                     0.900(5)   ?
O100           H102           .              .                     0.901(5)   ?

loop_
        _geom_angle_atom_site_label_1
        _geom_angle_atom_site_label_2
        _geom_angle_atom_site_label_3
        _geom_angle_site_symmetry_1
        _geom_angle_site_symmetry_2
        _geom_angle_site_symmetry_3
        _geom_angle
        _geom_angle_publ_flag
C21       SI1       C31       .         .         .         108.90(19)        Y
C21       SI1       C1        .         .         .           108.0(2)        Y
C31       SI1       C1        .         .         .         113.53(18)        Y
C21       SI1       C11       .         .         .         109.77(18)        Y
C31       SI1       C11       .         .         .           108.1(2)        Y
C1        SI1       C11       .         .         .         108.57(19)        Y
C6        C1        C2        .         .         .           116.2(4)        Y
C6        C1        SI1       .         .         .           119.4(3)        Y
C2        C1        SI1       .         .         .           124.4(3)        Y
C3        C2        C1        .         .         .           121.1(4)        Y
C3        C2        H2        .         .         .              119.4        ?
C1        C2        H2        .         .         .              119.4        ?
C4        C3        C2        .         .         .           120.8(4)        Y
C4        C3        H3        .         .         .              119.6        ?
C2        C3        H3        .         .         .              119.6        ?
C3        C4        O7        .         .         .           119.1(3)        Y
C3        C4        C5        .         .         .           120.7(4)        Y
O7        C4        C5        .         .         .           120.3(4)        Y
C6        C5        C4        .         .         .           118.1(4)        Y
C6        C5        H5        .         .         .                121        ?
C4        C5        H5        .         .         .                121        ?
C1        C6        C5        .         .         .           123.2(4)        Y
C1        C6        H6        .         .         .              118.4        ?
C5        C6        H6        .         .         .              118.4        ?
C4        O7        H71       .         .         .              109.5        ?
C12       C11       C16       .         .         .           117.3(4)        Y
C12       C11       SI1       .         .         .           121.4(3)        Y
C16       C11       SI1       .         .         .           121.3(3)        Y
C11       C12       C13       .         .         .           121.6(5)        Y
C11       C12       H12       .         .         .              119.2        ?
C13       C12       H12       .         .         .              119.2        ?
C14       C13       C12       .         .         .           119.0(5)        Y
C14       C13       H13       .         .         .              120.5        ?
C12       C13       H13       .         .         .              120.5        ?
C15       C14       C13       .         .         .           121.5(4)        Y
C15       C14       O17       .         .         .           121.0(4)        Y
C13       C14       O17       .         .         .           117.4(4)        Y
C14       C15       C16       .         .         .           118.0(4)        Y
C14       C15       H15       .         .         .                121        ?
C16       C15       H15       .         .         .                121        ?
C11       C16       C15       .         .         .           122.7(4)        Y
C11       C16       H16       .         .         .              118.6        ?
C15       C16       H16       .         .         .              118.6        ?
C14       O17       H171      .         .         .              109.5        ?
C22       C21       C26       .         .         .           115.8(4)        Y
C22       C21       SI1       .         .         .           123.6(3)        Y
C26       C21       SI1       .         .         .           120.5(3)        Y
C23       C22       C21       .         .         .           123.6(4)        Y
C23       C22       H22       .         .         .              118.2        ?
C21       C22       H22       .         .         .              118.2        ?
C22       C23       C24       .         .         .           118.1(4)        Y
C22       C23       H23       .         .         .                121        ?
C24       C23       H23       .         .         .                121        ?
C25       C24       O27       .         .         .           122.1(4)        Y
C25       C24       C23       .         .         .           120.0(4)        Y
O27       C24       C23       .         .         .           117.9(4)        Y
C24       C25       C26       .         .         .           121.4(4)        Y
C24       C25       H25       .         .         .              119.3        ?
C26       C25       H25       .         .         .              119.3        ?
C25       C26       C21       .         .         .           121.1(4)        Y
C25       C26       H26       .         .         .              119.4        ?
C21       C26       H26       .         .         .              119.4        ?
C24       O27       H27       .         .         .              109.5        ?
C36       C31       C32       .         .         .           115.5(4)        Y
C36       C31       SI1       .         .         .           120.9(3)        Y
C32       C31       SI1       .         .         .           123.4(3)        Y
C33       C32       C31       .         .         .           122.4(4)        Y
C33       C32       H32       .         .         .              118.8        ?
C31       C32       H32       .         .         .              118.8        ?
C32       C33       C34       .         .         .           119.9(4)        Y
C32       C33       H33       .         .         .              120.1        ?
C34       C33       H33       .         .         .              120.1        ?
C33       C34       C35       .         .         .           120.2(4)        Y
C33       C34       O37       .         .         .           118.6(4)        Y
C35       C34       O37       .         .         .           121.2(4)        Y
C34       C35       C36       .         .         .           119.4(4)        Y
C34       C35       H35       .         .         .              120.3        ?
C36       C35       H35       .         .         .              120.3        ?
C35       C36       C31       .         .         .           122.5(4)        Y
C35       C36       H36       .         .         .              118.8        ?
C31       C36       H36       .         .         .              118.8        ?
C34       O37       H371      .         .         .              109.5        ?
H101      O100      H102      .         .         .             157(9)        ?

loop_
_geom_hbond_atom_site_label_D
_geom_hbond_atom_site_label_H
_geom_hbond_atom_site_label_A
_geom_hbond_distance_DH
_geom_hbond_distance_HA
_geom_hbond_distance_DA
_geom_hbond_angle_DHA
_geom_hbond_site_symmetry_A
O7     H71    O17      0.84        1.87    2.683(5)       163.2    3_455
O17    H171   O100     0.84        1.78    2.611(6)       169.9    .
O27    H27    O100     0.84        1.96    2.781(6)       165.6    8_455
O37    H371   O7       0.84        1.91    2.692(4)       153.9    6


_diffrn_measured_fraction_theta_max    0.998
_diffrn_reflns_theta_full              69.93
_diffrn_measured_fraction_theta_full   0.998
_refine_diff_density_max    0.524
_refine_diff_density_min   -0.658
_refine_diff_density_rms    0.092


#==END


#                                                                END OF THE CIF FILE
